# Supplementary material
Source: PubMed Central journal article supplement (PMC5410377)
Supplement: NIHMS839398-supplement-1.pdf [file NIHMS839398-supplement-1.pdf]

A

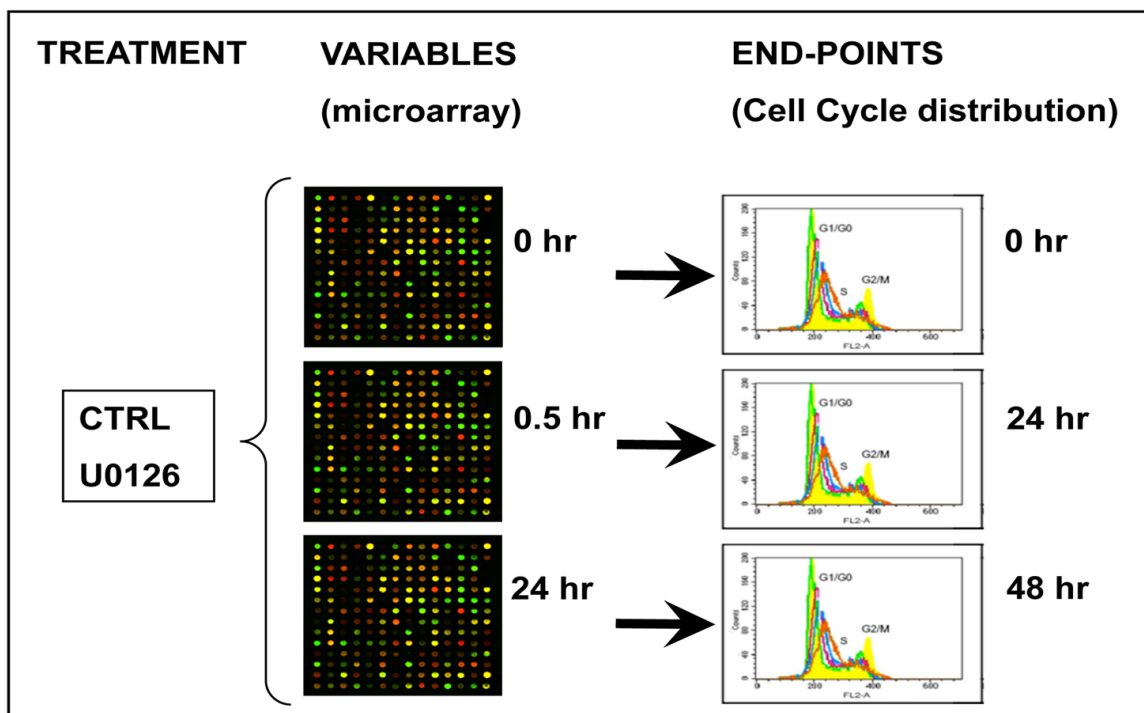

B

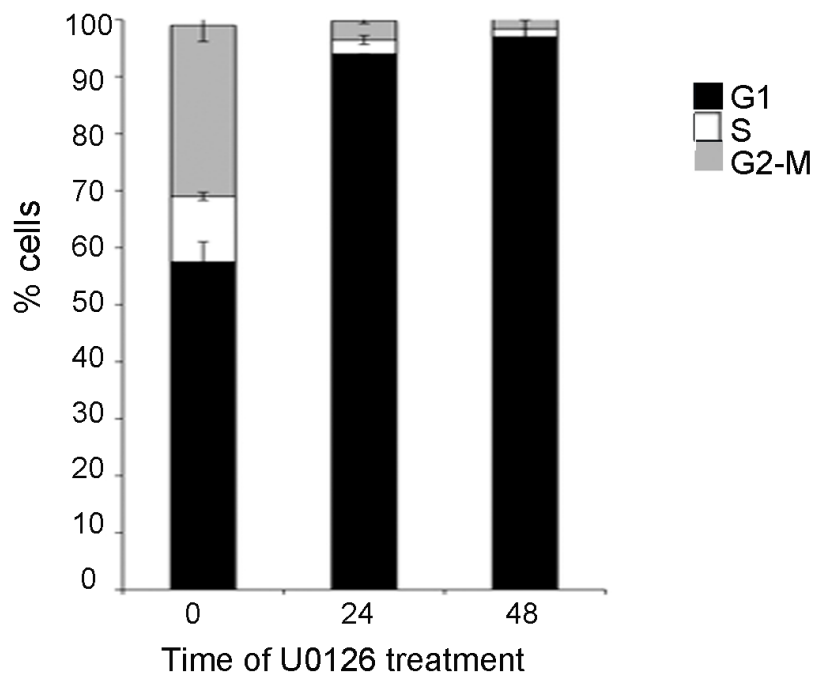

Figure S1

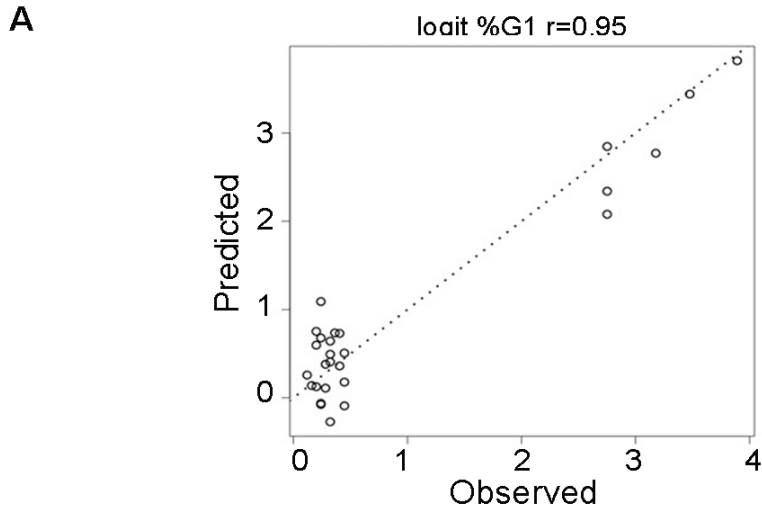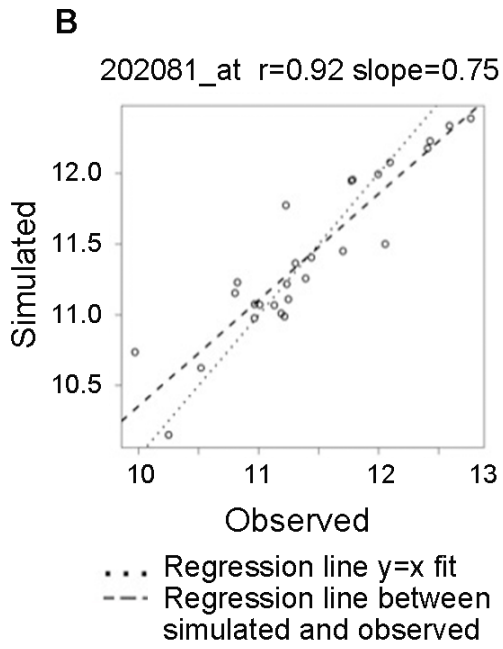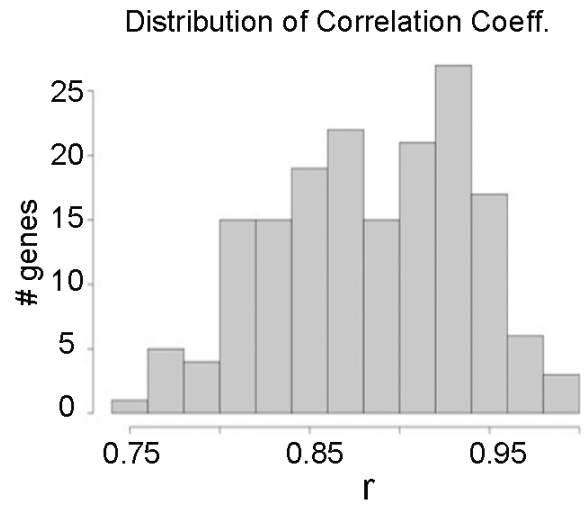

**Figure S2.**

A

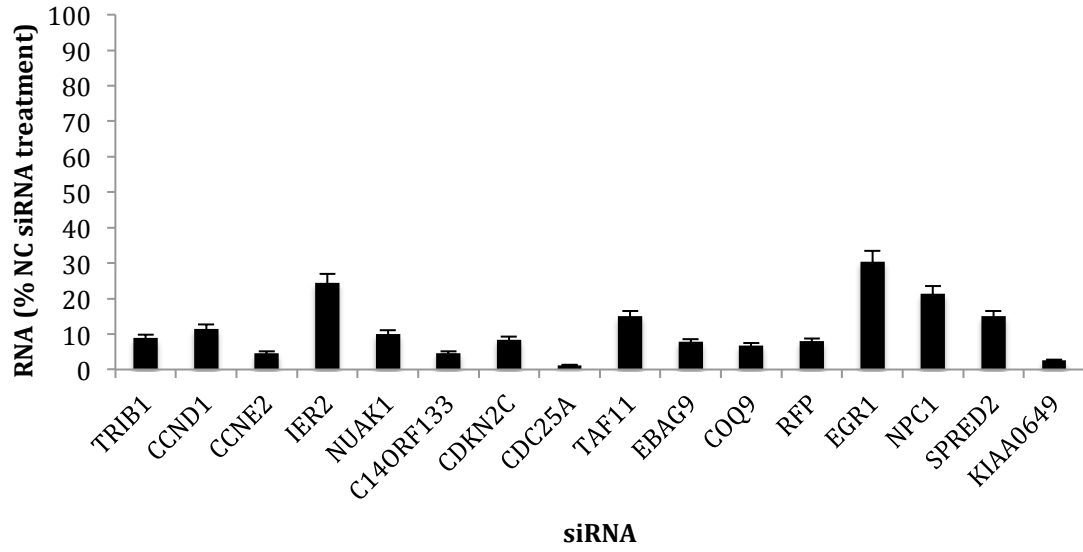

B

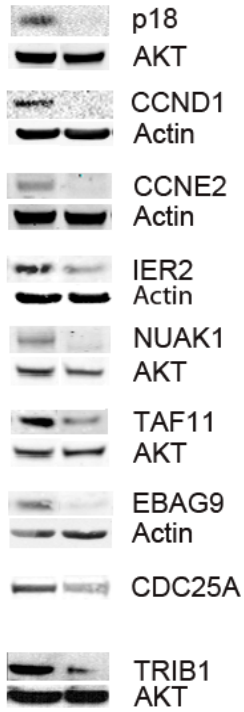

Figure S3.

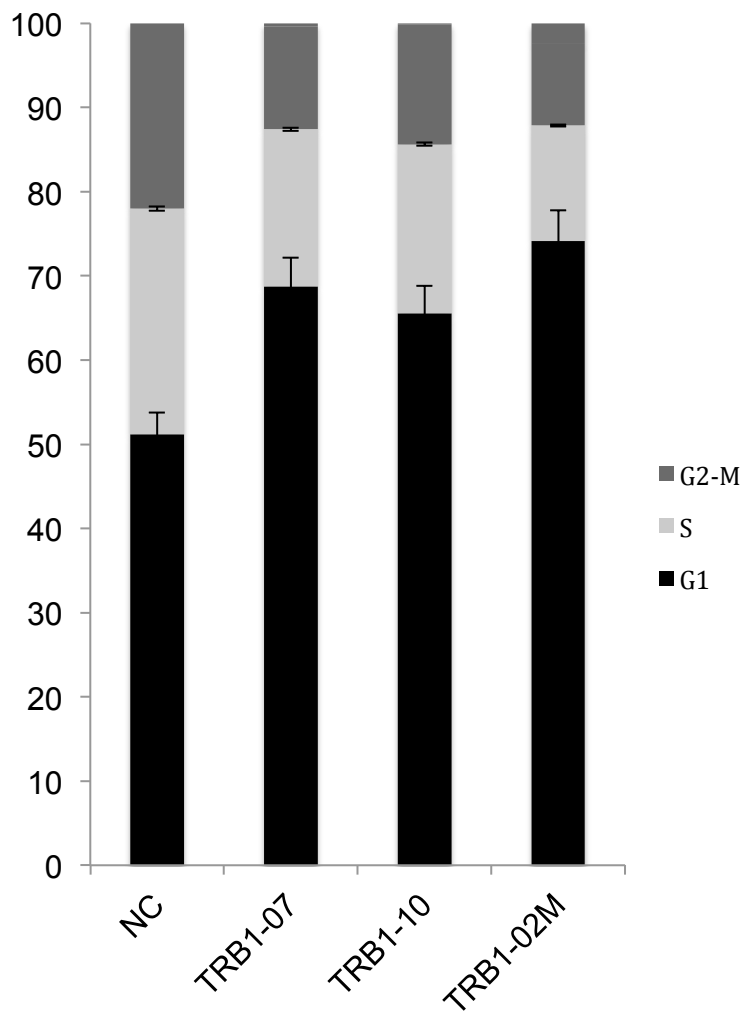

**Figure S4.**

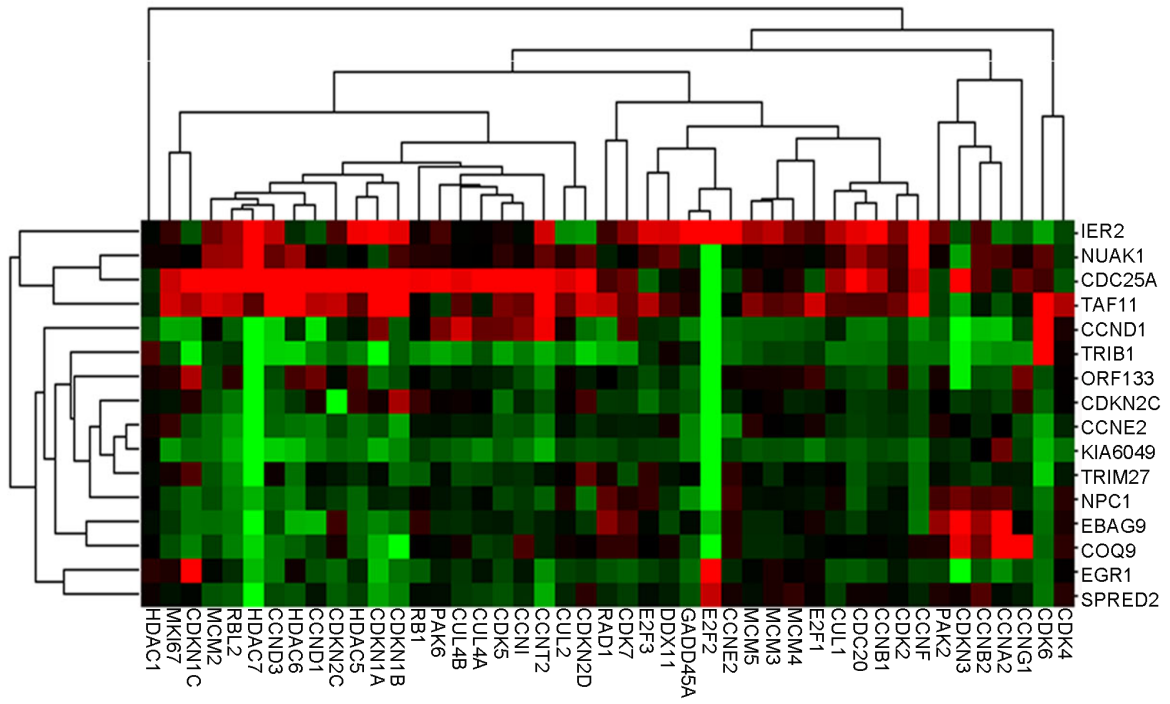

Figure S5.

A.

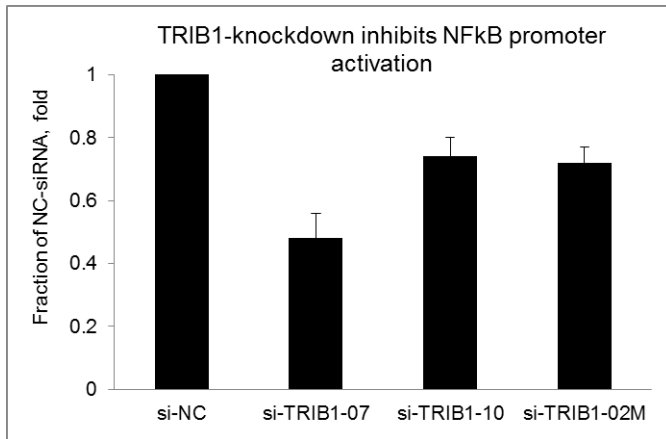

B.

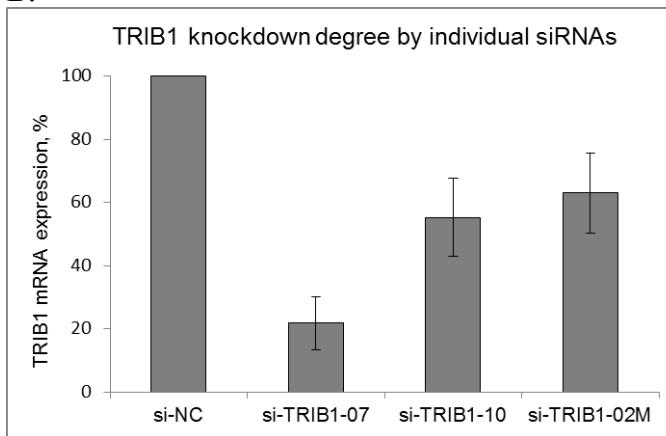

**Figure S6.**

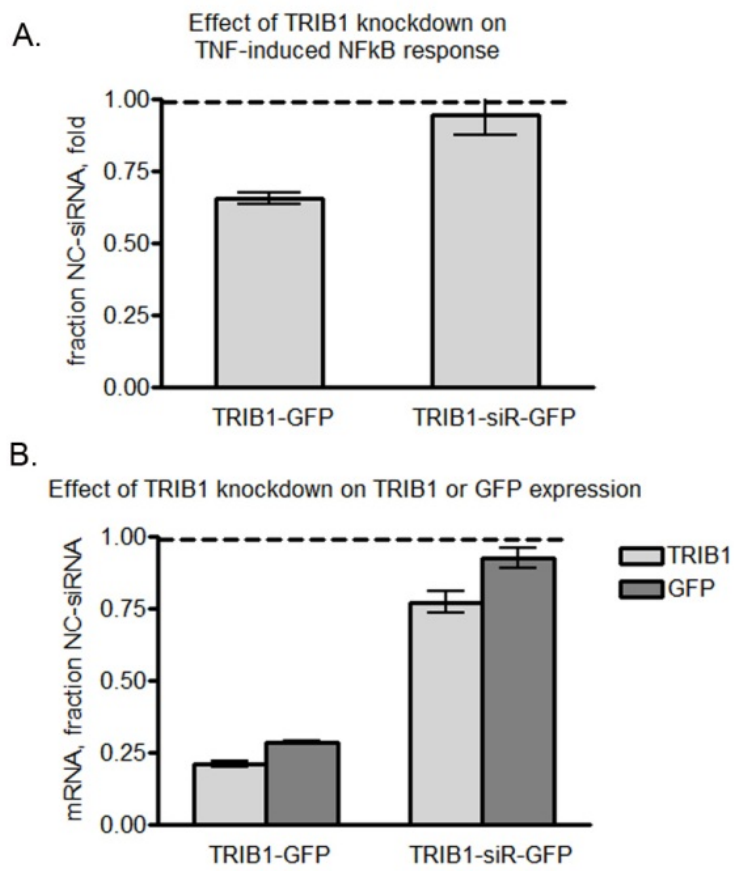

**Figure S7.**

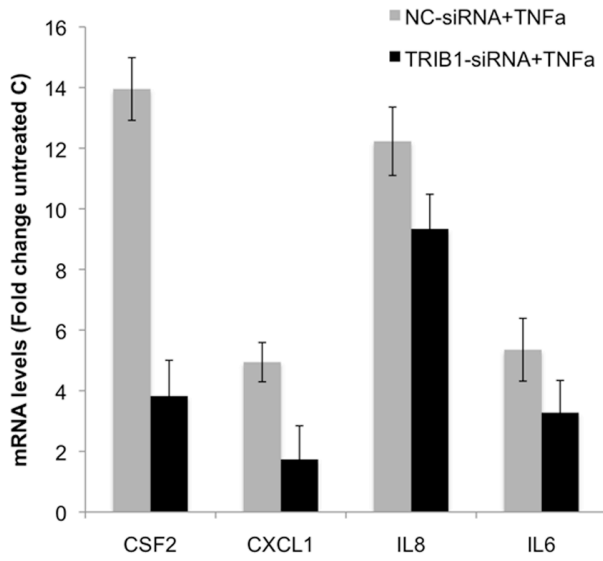

**Figure S8.**

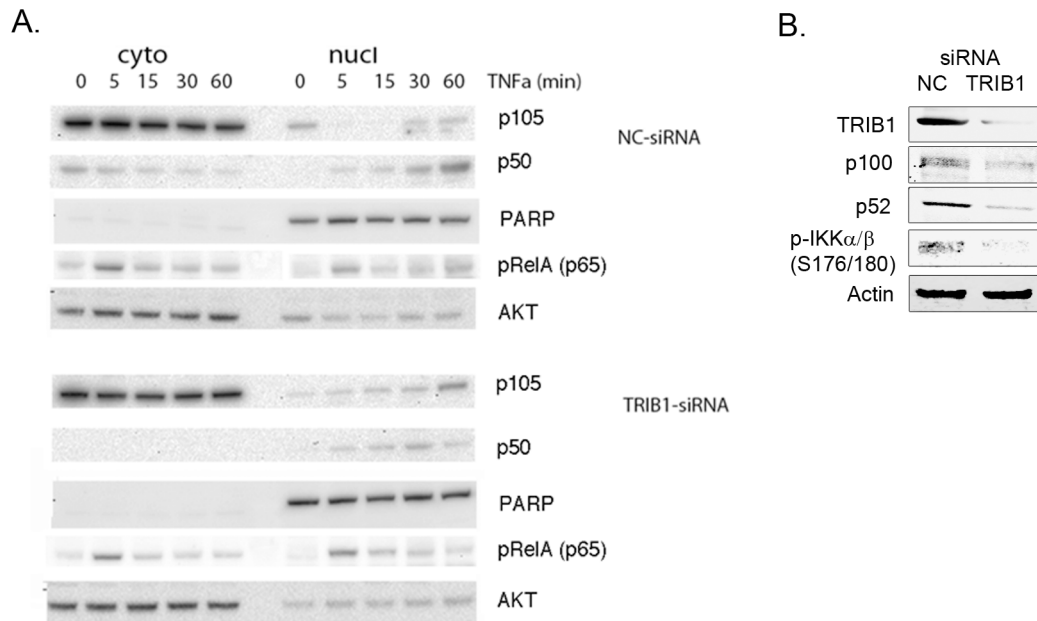

**Figure S9.**



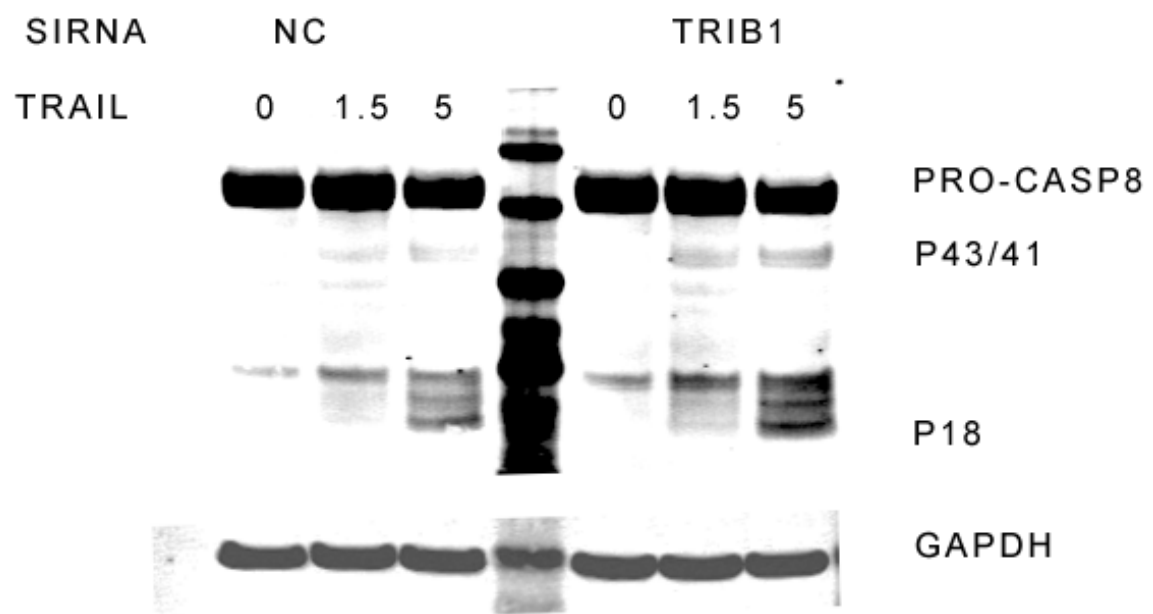

**Figure S10.**

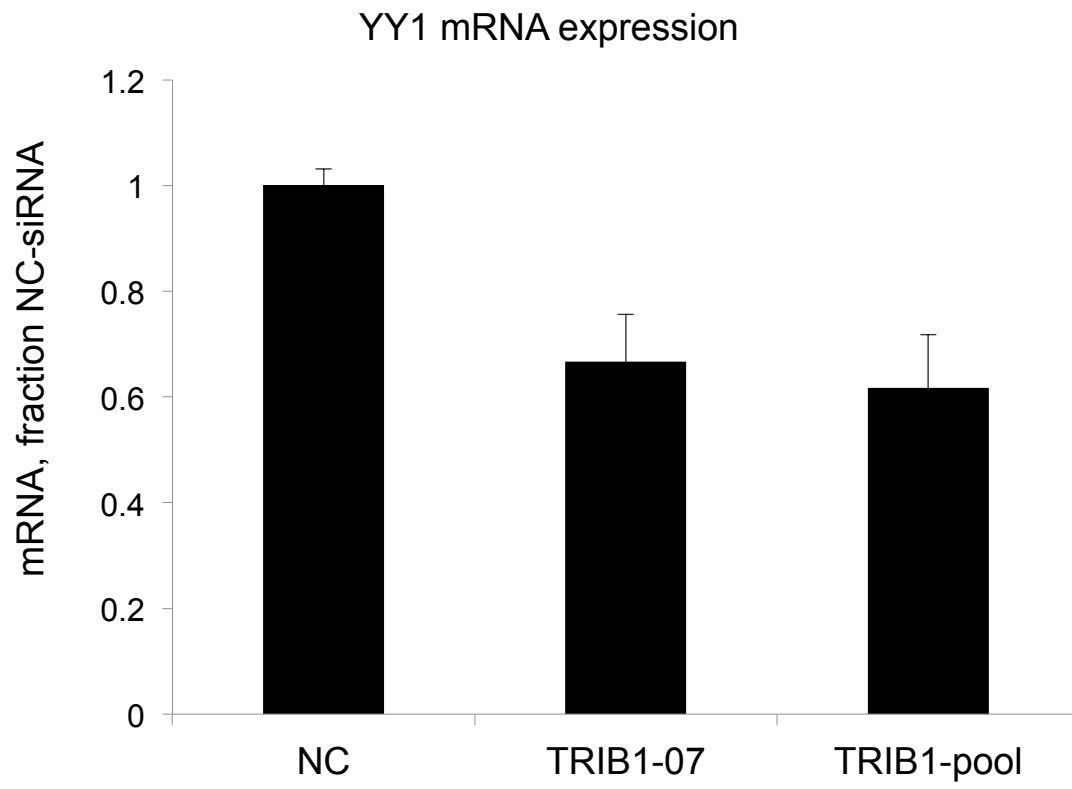

**Figure S11.**

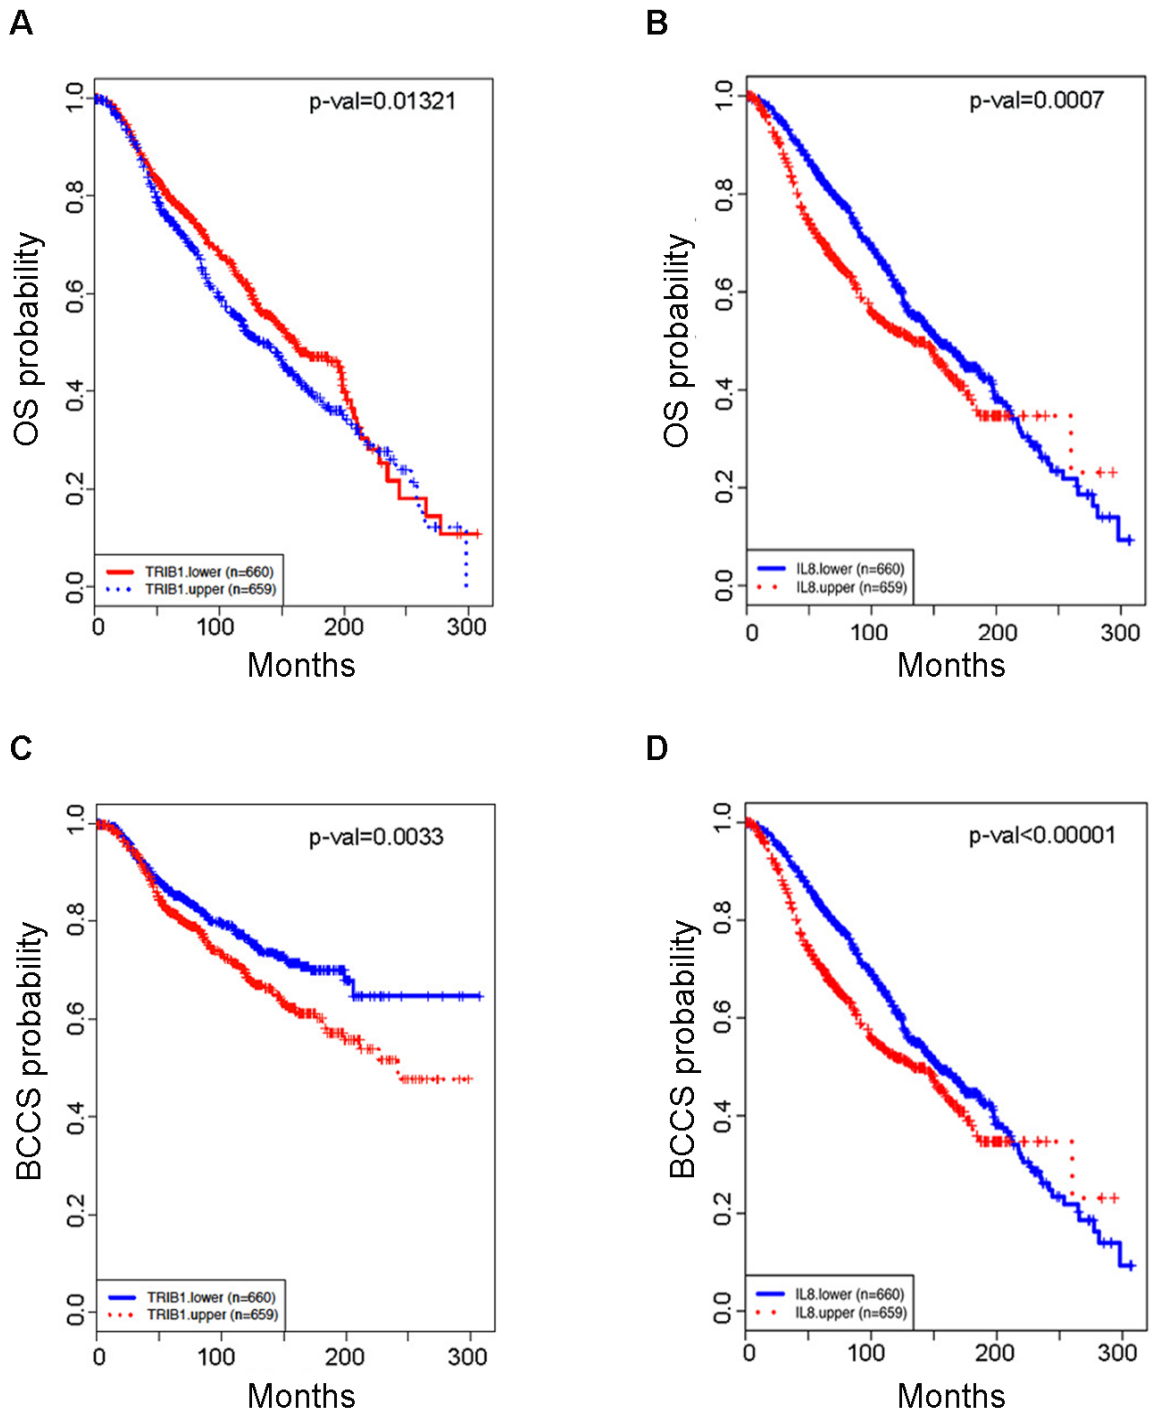

**Figure S12.**

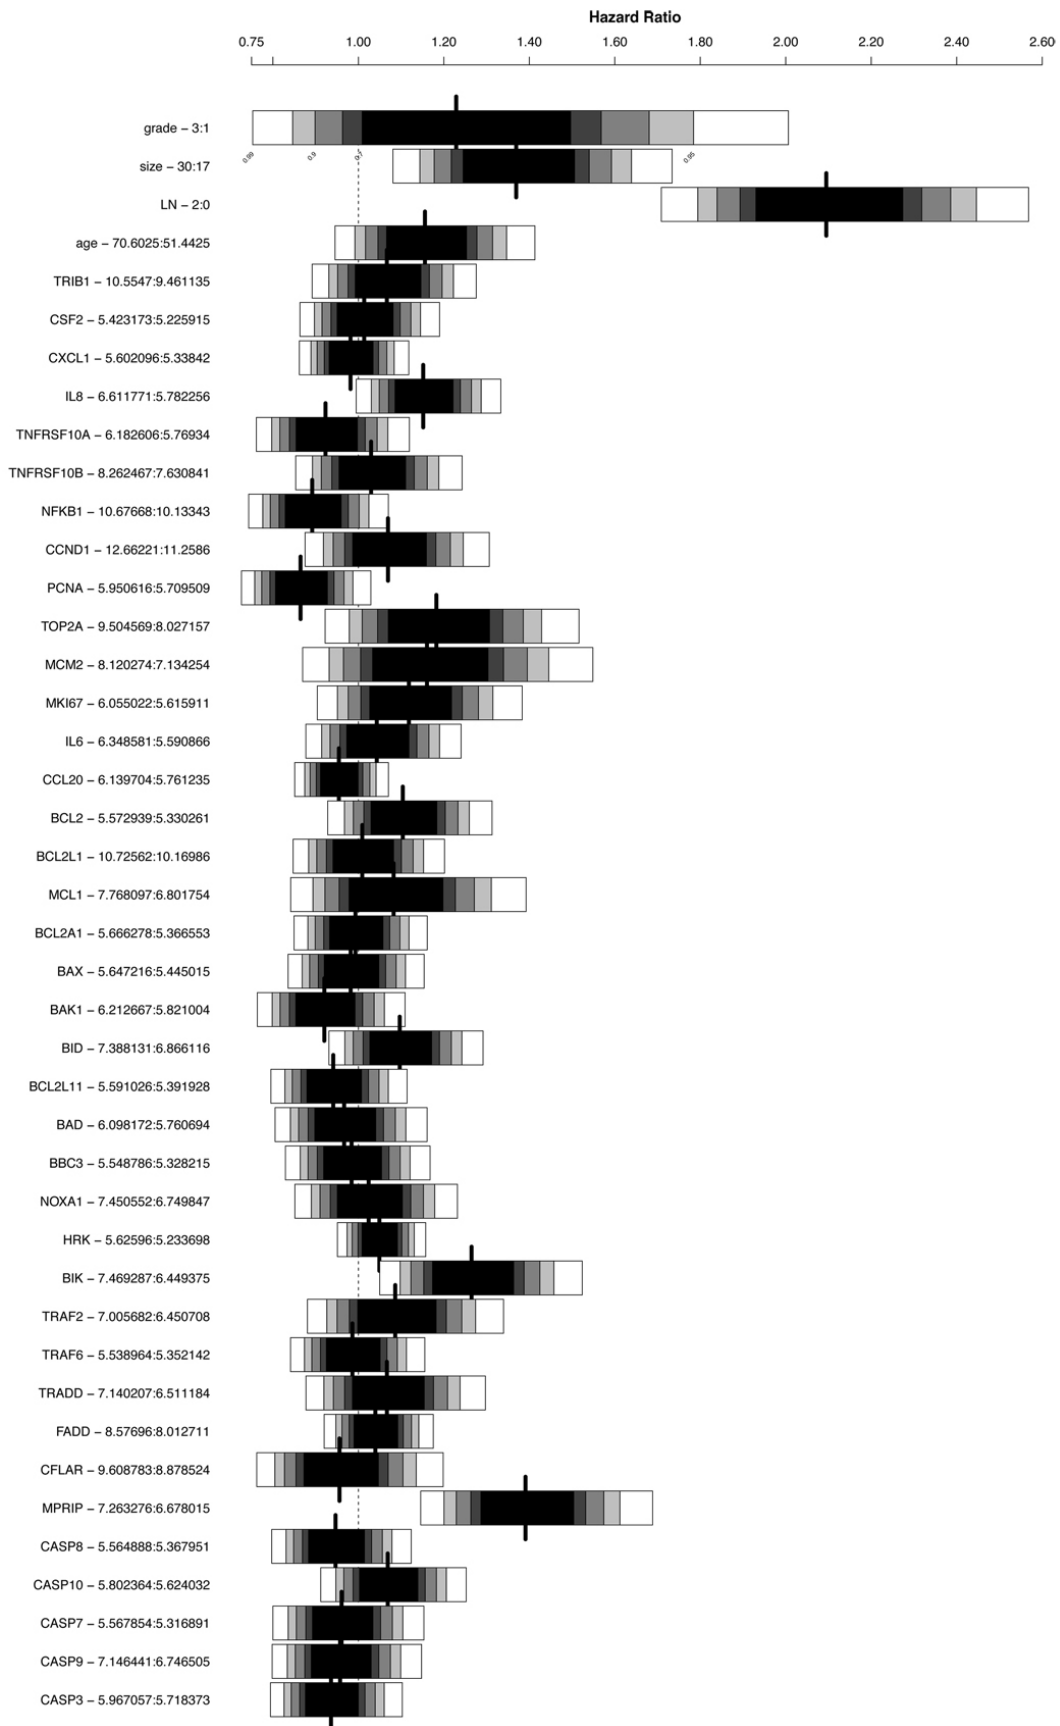

**Figure S13.**

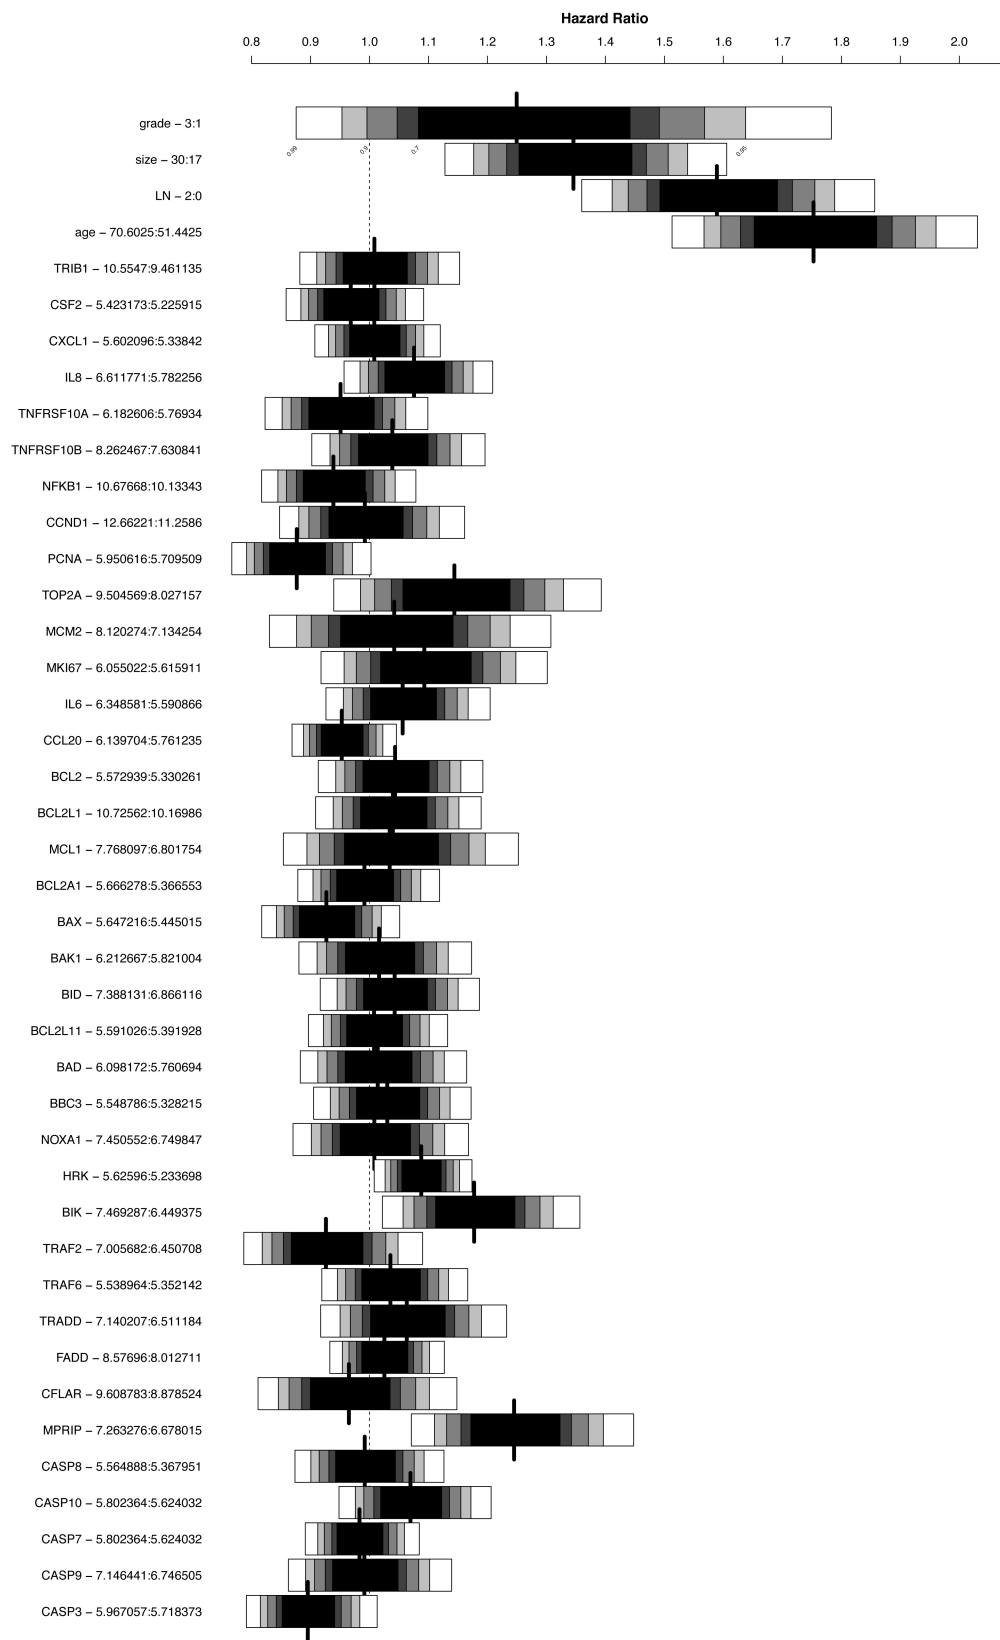

**Figure S14.**
